# Supplementary material for: Evaluating the Utility of Peripheral Blood Parameters for Early Identification of Severe Mycoplasma Pneumoniae Pneumonia
Source: Research Square preprint supplement (doi:10.21203/rs.3.rs-6157988/v1), 2025-03-11
Supplement: Supplementary file 1 [file b1d414db144a569ecbfb51b2.docx]

Table S1 Patients with Mycoplasma pneumoniae pneumonia co-infected with other pathogens.

| **co-infection** | **MMP (%)**  **(N=39)** |
| --- | --- |
| **Virus infection** | 31(79.49%) |
| *Epstein-Barr Virus* | 12(30.77%) |
| *Rhinovirus* | 11(28.21%) |
| *Respiratory Syncytial Virus* | 5(12.82%) |
| *Influenza Virus* | 1(2.56%) |
| *Epstein-Barr Virus+Rhinovirus* | 2(5.13%) |
| **Bacteria infection** | 8(20.51%) |
| *Streptococcus pneumoniae* | 2(5.13%) |
| *Streptococcus mitis* | 1(2.56%) |
| *Streptococcus haryngitis* | 1(2.56%) |
| *streptococcus constellatus* | 1(2.56%) |
| *Staphylococcus aureus* | 1(2.56%) |
| *staphylococcus hominis* | 1(2.56%) |
| *mycobacterium tuberculosis* | 1(2.56%) |

Table S2 Modified disease severity score.[1]

| **Symptoms** | **point score** |
| --- | --- |
| Fever | 1 |
| Cough | 1 |
| Rhinorrhea | 1 |
| Duration of illness > 4 days | 1 |
| Apnoea | 3 |
| Wheezing | 5 |
| Cyanosis | 5 |
| Retractions | 5 |
| Tachypnea | 5 |

Table S3 Correlations of parameters with disease severity indexes.

| **Parameters** | **DSS** | | **SOFA** | | **LOS** | |
| --- | --- | --- | --- | --- | --- | --- |
| ***p*** | ***r*** | ***p*** | ***r*** | ***p*** | ***r*** |
| Temperature ≥40°C | 0.315 | 0.051 | **0.002** | 0.156 | **<0.001** | 0.217 |
| HGB | **<0.001** | -0.255 | **0.019** | -0.119 | 0.063 | -0.094 |
| L | 0.353 | -0.047 | **<0.001** | -0.218 | **<0.001** | -0.185 |
| M | 0.164 | -0.070 | **0.002** | -0.153 | 0.086 | -0.087 |
| N | **0.027** | 0.112 | **0.024** | 0.114 | 0.201 | 0.065 |
| CRP | 0.887 | -0.007 | **0.002** | 0.158 | **0.002** | 0.160 |
| SAA | 0.951 | -0.003 | 0.145 | 0.081 | **<0.001** | 0.193 |
| PCT | 0.095 | 0.118 | **0.003** | 0.207 | **<0.001** | 0.304 |
| ALB | 0.710 | -0.020 | 0.061 | -0.099 | **<0.001** | -0.197 |
| TP | **0.006** | -0.145 | **0.014** | -0.130 | 0.059 | -0.100 |
| NLR | **0.019** | 0.118 | **<0.001** | 0.233 | **0.001** | 0.175 |
| dNLR | **0.009** | 0.131 | **<0.001** | 0.240 | **<0.001** | 0.176 |
| PLR | **0.006** | 0.139 | **0.006** | 0.139 | **0.001** | 0.164 |
| LCR | 0.858 | 0.009 | **<0.001** | -0.200 | **<0.001** | -0.195 |
| PNI | 0.473 | 0.036 | **0.011** | -0.128 | **0.007** | -0.137 |
| CAR | 0.810 | -0.013 | **0.005** | 0.150 | **0.001** | 0.169 |

Abbreviations: DSS, disease severity score; SOFA, sequential organ failure assessment; LOS, Length of stay; r, correlation coefficient; HGB, hemoglobin; L, lymphocyte; M, monocyte; N, neutrophil; CRP, C-reactive protein; SAA, Serum amyloid A; PCT, Procalcitonin; ALB, albumin; TP, total protein; NLR, neutrophil-to-lymphocyte ratio; dNLR, derived neutrophil-to-lymphocyte ratio; PLR, platelet‐to‐lymphocyte ratio; LCR, lymphocyte‐to-C‐reactive protein ratio; PNI, prognostic nutritional index; CAR, C‐reactive protein-to-albumin ratio. Statistically significant (p < 0.05) results are in bold.

Table S4 ROC curve analysis for predicting the occurrence of severe Mycoplasma pneumoniae pneumonia.

| **Parameters** | | **AUC** | **95% CI** | ***p*** | **Optimal cutoff value** | **Specificity** | **Sensitivity** |
| --- | --- | --- | --- | --- | --- | --- | --- |
| HGB | 0.675 | [0.603-0.747] | **<0.001** | 123.5 | 0.471 | 0.833 |
| L | 0.641 | [0.569-0.713] | **<0.001** | 1.92 | 0.6 | 0.667 |
| M | 0.624 | [0.550-0.697] | **0.001** | 0.55 | 0.553 | 0.694 |
| SAA | 0.598 | [0.503-0.692] | **0.034** | 206.23 | 0.938 | 0.313 |
| PCT | 0.601 | [0.513-0.689] | **0.028** | 0.11 | 0.646 | 0.507 |
| ALB | 0.617 | [0.537-0.696] | **0.002** | 37.85 | 0.388 | 0.917 |
| NLR | 0.678 | [0.588-0.769] | **<0.001** | 3.08 | 0.75 | 0.642 |
| dNLR | 0.667 | [0.576-0.758] | **<0.001** | 2.35 | 0.781 | 0.567 |
| PLR | **0.723** | **[0.642-0.803]** | **<0.001** | 117.33 | 0.573 | 0.806 |
| LCR | 0.590 | [0.511-0.668] | **0.016** | 0.11 | 0.412 | 0.843 |
| PNI | 0.670 | [0.594-0.745] | **<0.001** | 49.28 | 0.565 | 0.792 |

Abbreviations: ROC, receiver operating characteristic; AUC, area under the curve; CI, confidence interval; HGB, hemoglobin; L, lymphocyte; M, monocyte; SAA, Serum amyloid A; PCT, Procalcitonin; ALB, albumin; NLR, neutrophil-to-lymphocyte ratio; dNLR, derived neutrophil-to-lymphocyte ratio; PLR, platelet‐to‐lymphocyte ratio; LCR, lymphocyte‐to-C‐reactive protein ratio; PNI, prognostic nutritional index. Bold type indicates significant differences (*p* < 0.05).

Table S5 ROC curve analysis for predicting the admission to PICU due to severe Mycoplasma pneumoniae pneumonia.

| **Parameters** | **AUC** | **95% CI** | ***p*** | **Optimal cutoff value** | **Specificity** | **Sensitivity** |
| --- | --- | --- | --- | --- | --- | --- |
| HGB | 0.676 | [0.563-0.790] | **0.005** | 122.5 | 0.591 | 0.707 |
| TP | 0.648 | [0.530-0.766] | **0.019** | 65.95 | 0.432 | 0.854 |
| GLB | 0.659 | [0.542-0.776] | **0.012** | 24.5 | 0.409 | 0.927 |
| AGR | 0.651 | [0.517-0.784] | **0.047** | 1.48 | 0.818 | 0.6 |
| SCR | 0.657 | [0.538-0.776] | **0.013** | 5.73 | 0.614 | 0.732 |

Abbreviations: ROC, receiver operating characteristic; AUC, area under the curve; CI, confidence interval; HGB, hemoglobin; TP, total protein; GLB, globulin; AGR, albumin-to-globulin ratio; SCR, Serum amyloid A -to- C-reactive Protein ratio. Bold type indicates significant differences (*p* < 0.05).

Table S6 Risk factors for severe Mycoplasma pneumoniae pneumonia and univariate analysis.

| **Characteristics** | **SMMP** | **MMP** | **OR** | **95% CI** | ***p*** |
| --- | --- | --- | --- | --- | --- |
| **(N=106, 27.11%)** | **(N=285, 72.89%)** |
| Age | 6（4,8） | 6（4,8） | 1.012 | 0.937-1.094 | 0.757 |
| Temperature ≥40°C | 27(25.47%) | 31(10.88%) | 2.8 | 1.577-4.974 | **<0.001** |
| male sex | 53 (50.00%) | 153 (53.68%) | 1.159 | 0.742-1.812 | 0.517 |
| HGB | 126(118, 134) | 132(125,139) | 1.053 | 1.031-1.074 | **<0.001** |
| WBC | 8.59(6.25,10.95) | 7.74(6.35,9.74) | 1.046 | 0.992-1.103 | 0.097 |
| PLT | 275(231,364) | 258(206,319) | 1.003 | 1.001-1.006 | **0.006** |
| L | 1.79(1.35,2.51) | 2.27(1.68,3.13) | 1.282 | 1.05-1.565 | **0.015** |
| M | 0.54(0.36,0.85) | 0.65(0.48,0.87) | 1.105 | 0.678-1.805 | 0.688 |
| N | 5.68(3.69,7.61) | 4.47(3.53,6.09) | 1.103 | 1.03-1.182 | **0.005** |
| CRP | 10.11(3.51,27.12) | 8.11(3.05,15.95) | 1.022 | 1.011-1.034 | **<0.001** |
| SAA | 78.85(20.38,226.30) | 55.16(23.89,113.68) | 1.004 | 1.002-1.007 | **<0.001** |
| PCT | 0.11(0.07,0.29) | 0.08(0.05,0.14) | 5.078 | 1.158-22.278 | **0.031** |
| ALB | 39.5(35.5,42.6) | 41.5(39.3,43.3) | 1.166 | 1.092-1.242 | **<0.001** |
| TP | 68.7(64.2,72.1) | 70.0(67.2,73.5) | 1.062 | 1.018-1.106 | **0.005** |
| GLB | 28.6(24.8,32.8) | 28.9(26.5,31.3) | 1.016 | 0.98-1.054 | 0.385 |
| NLR | 3.13(1.63,4.82) | 2.06(1.37,3.08) | 1.378 | 1.224-1.552 | **<0.001** |
| dNLR | 2.15(1.29,3.35) | 1.54(1.07,2.16) | 1.572 | 1.324-1.867 | **<0.001** |
| LMR | 3.37(2.34,4.89) | 3.56(2.67,4.95) | 1.009 | 0.912-1.116 | 0.862 |
| PLR | 156.84(102.08,225.61) | 109.42(83.02,154.27) | 1.008 | 1.005-1.012 | **<0.001** |
| LCR | 0.17(0.05,0.72) | 0.30(0.13,0.79) | 1.025 | 0.96-1.094 | 0.462 |
| PNI | 47.45(42.85,53.85) | 52.50(47.63,56.65) | 1.011 | 0.996-1.026 | 0.154 |
| CAR | 0.27(0.08,0.72) | 0.21(0.08,0.40) | 2.695 | 1.676-4.333 | **<0.001** |
| AGR | 1.41(1.12,1.72) | 1.43(1.31,1.57) | 1.404 | 0.629-3.145 | 0.407 |
| SCR | 6.88(3.60,13.85) | 6.66(3.63,13.02) | 1.003 | 0.997-1.01 | 0.311 |

Abbreviations: SMMP, severe mycoplasma pneumoniae pneumonia; MMP, mycoplasma pneumoniae pneumonia; OR, odds ratio; CI, confidence interval; HGB, hemoglobin; WBC, white blood cell; PLT, platelet; L, lymphocyte; M, monocyte; N, neutrophil; CRP, C-reactive protein; SAA, Serum amyloid A; PCT, Procalcitonin; ALB, albumin; TP, total protein; GLB, globulin; NLR, neutrophil-to-lymphocyte ratio; dNLR, derived neutrophil-to-lymphocyte ratio; LMR, lymphocyte‐to-monocyte ratio; PLR, platelet‐to‐lymphocyte ratio; LCR, lymphocyte‐to-C‐reactive protein ratio; PNI, prognostic nutritional index; CAR, C‐reactive protein-to-albumin ratio; AGR, albumin-to-globulin ratio; SCR, Serum amyloid A -to- C-reactive Protein ratio. Bold type indicates significant differences (*p* < 0.05).

Table S7 Independent risk factors for severe Mycoplasma pneumoniae pneumonia and multivariate logistic regression analysis.

| **Characteristics** | **OR** | **95% CI** | ***p*** |
| --- | --- | --- | --- |
| Temperature ≥40°C | 1.057 | 0.328-3.413 | 0.926 |
| HGB | 1.072 | 1.029-1.117 | **<0.001** |
| PLT | 1.005 | 0.997-1.012 | 0.199 |
| L | 1.253 | 0.759-2.069 | 0.379 |
| N | 1.241 | 0.87-1.767 | 0.233 |
| CRP | 1.083 | 0.904-1.299 | 0.384 |
| SAA | 1.003 | 0.997-1.008 | 0.348 |
| PCT | 1.182 | 0.254-5.496 | 0.831 |
| ALB | 1.057 | 0.9-1.241 | 0.5 |
| TP | 1.038 | 0.951-1.134 | 0.397 |
| NLR | 2.484 | 0.834-7.395 | 0.102 |
| dNLR | 1.770 | 0.438-7.143 | 0.423 |
| PLR | 1.004 | 0.991-1.017 | 0.583 |
| CAR | 39.903 | 0.022-72462.941 | 0.336 |

Abbreviations: OR, odds ratio; CI, confidence interval; HGB, hemoglobin; PLT, platelet; L, lymphocyte; N, neutrophil; C-reactive protein; SAA, Serum amyloid A; PCT, Procalcitonin; ALB, albumin; TP, total protein; NLR, neutrophil-to-lymphocyte ratio; dNLR, derived neutrophil-to-lymphocyte ratio; PLR, platelet‐to‐lymphocyte ratio; CAR, C‐reactive protein-to-albumin ratio; Bold type indicates significant differences (*p* < 0.05).

Table S8 Risk factors for PICU admission in children with severe Mycoplasma pneumoniae pneumonia and univariate analysis.

| **Characteristics** | **PICU** | **GW** | **OR** | **95% CI** | ***p*** |
| --- | --- | --- | --- | --- | --- |
| **(N=47, 48.75%)** | **(N=59, 51.25%)** |
| Age | 4(3,7) | 7(5,8) | 1.217 | 1.027-1.403 | **0.007** |
| Temperature ≥40°C | 27(25.47%) | 31(10.88%) | 1.836 | 0.76-4.435 | 0.177 |
| male sex | 20(51.28%) | 21(51.22%) | 1.079 | 0.502-2.323 | 0.845 |
| HGB | 119(109,130) | 127(119,138) | 1.052 | 1.017-1.086 | **0.002** |
| WBC | 10.29(6.29,12.84) | 8.47(6.36,9.96) | 1.085 | 0.981-1.2 | 0.114 |
| PLT | 282(238,374) | 267(214,362) | 1.002 | 0.998-1.005 | 0.386 |
| L | 1.80(1.16,2.30) | 1.72(1.35,2.33) | 1.041 | 0.792-1.366 | 0.775 |
| M | 0.49(0.34,0.82) | 0.56(0.44,0.87) | 1.119 | 0.585-2.137 | 0.735 |
| N | 6.31(3.73,8.83) | 5.73(3.87,7.16) | 1.123 | 0.995-1.267 | 0.169 |
| CRP | 11.50(3.35,52.35) | 11.67(5.29,25.85) | 1.016 | 1.002-1.031 | **0.026** |
| SAA | 72.44(22.18,244.64) | 118.72(42.66,184.11) | 1.001 | 0.999-1.004 | 0.258 |
| PCT | 0.12(0.07,0.37) | 0.11(0.08,0.23) | 1.576 | 0.721-3.442 | 0.254 |
| ALB | 39.1(35.4,42.2) | 37.1(34.4,40.6) | 1.003 | 0.929-1.085 | 0.931 |
| TP | 66.7(61.7,70.7) | 68.9(65.1,71.7) | 1.053 | 0.994-1.115 | 0.078 |
| GLB | 26.3(21.8,30.7) | 29.9(27.2,35.3) | 1.062 | 0.997-1.131 | 0.064 |
| NLR | 3.39(1.78,5.67) | 2.82(1.85,4.64) | 1.15 | 1.008-1.312 | **0.038** |
| dNLR | 2.38(1.36,4.62) | 2.07(1.35,2.90) | 1.259 | 1.028-1.543 | **0.026** |
| LMR | 3.43(2.28,5.00) | 3.31(2.31,3.89) | 1.007 | 0.875-1.157 | 0.927 |
| PLR | 165.86(117.37,249.49) | 160.67(113.96,210.34) | 1.003 | 0.999-1.007 | 0.136 |
| LCR | 0.17(0.04,0.78) | 0.12(0.06,0.42) | 1.086 | 0.947-1.244 | 0.237 |
| PNI | 47.00(43.50,55.80) | 45.30(40.88,48.70) | 1.025 | 0.991-1.059 | 0.153 |
| CAR | 0.31(0.09,1.63) | 0.32(0.13,0.71) | 1.656 | 1.042-2.633 | **0.033** |
| AGR | 1.50(1.22,1.88) | 1.27(1.00,1.42) | 3.447 | 1.214-9.785 | **0.02** |
| SCR | 4.29(2.15,8.49) | 11.74(6.45,16.86) | 1.003 | 0.994-1.013 | 0.497 |

Abbreviations: PICU, pediatric intensive care unit; GW, general ward; OR, odds ratio; CI, confidence interval; HGB, hemoglobin; WBC, white blood cell; PLT, platelet; L, lymphocyte; M, monocyte; N, neutrophil; C-reactive protein; SAA, Serum amyloid A; PCT, Procalcitonin; ALB, albumin; TP, total protein; GLB, globulin; NLR, neutrophil-to-lymphocyte ratio; dNLR, derived neutrophil-to-lymphocyte ratio; LMR, lymphocyte‐to-monocyte ratio; PLR, platelet‐to‐lymphocyte ratio; LCR, lymphocyte‐to-C‐reactive protein ratio; PNI, prognostic nutritional index; CAR, C‐reactive protein-to-albumin ratio; AGR, albumin-to-globulin ratio; SCR, Serum amyloid A -to- C-reactive Protein ratio. Bold type indicates significant differences (*p* < 0.05).

Table S9 Independent risk factors for PICU admission in children with severe Mycoplasma pneumoniae pneumonia multivariate logistic regression analysis.

| **Characteristics** | **OR** | **95% CI** | ***p*** |
| --- | --- | --- | --- |
| Age | 1.236 | 1.01-1.513 | **0.04** |
| HGB | 1.025 | 0.986-1.065 | 0.214 |
| CRP | 1.005 | 0.933-1.082 | 0.89 |
| NLR | 1.377 | 0.756-2.513 | 0.296 |
| dNLR | 1.844 | 0.791-4.302 | 0.157 |
| CAR | 1.89 | 0.143-24.945 | 0.629 |
| AGR | 3.069 | 0.72-13.091 | 0.13 |

Abbreviations: PICU, pediatric intensive care unit; OR, odds ratio; CI, confidence interval; HGB, hemoglobin; C-reactive protein; NLR, neutrophil-to-lymphocyte ratio; dNLR, derived neutrophil-to-lymphocyte ratio; CAR, C‐reactive protein-to-albumin ratio; AGR, albumin-to-globulin ratio; Bold type indicates significant differences (*p* < 0.05).

Table S10 Principal component analysis based on the fifteen parameters exhibiting significant differences between the MMP and the SMMP group.

| **parameters** | **Variances** | **Loadings** | | | | **Eigenvalues** | **Percentages (%)** | **Sum (%)** |
| --- | --- | --- | --- | --- | --- | --- | --- | --- |
|  |  | **PC1** | **PC2** | **PC3** | **PC4** |  |  |  |
| LDC-related | L | -0.539 | -0.646 | 0.067 | -0.041 | 0.714 | 6.624 | 47.01 |
| M | 0.106 | -0.789 | -0.219 | -0.153 | 0.706 | 6.551 |
| N | 0.585 | -0.512 | -0.464 | -0.263 | 0.890 | 8.264 |
| NLR | 0.848 | 0.095 | -0.383 | -0.274 | 0.949 | 8.811 |
| dNLR | 0.772 | 0.296 | -0.342 | -0.244 | 0.859 | 7.977 |
| PLR | 0.583 | 0.556 | -0.259 | -0.075 | 0.722 | 6.704 |
| LCR | -0.352 | -0.268 | -0.140 | -0.095 | 0.224 | 2.082 |
| PBP-related | HGB | -0.242 | 0.205 | -0.519 | 0.357 | 0.498 | 4.624 | 17.59 |
| ALB | -0.483 | -0.025 | -0.637 | 0.224 | 0.690 | 6.408 |
| TP | -0.381 | 0.111 | -0.584 | 0.455 | 0.706 | 6.558 |
| PBI-related | CRP | 0.730 | -0.313 | 0.142 | 0.543 | 0.946 | 8.781 | 30.60 |
| SAA | 0.594 | -0.115 | 0.089 | 0.612 | 0.748 | 6.943 |
| PCT | 0.560 | -0.559 | -0.081 | -0.230 | 0.685 | 6.360 |
| CAR | 0.756 | -0.305 | 0.184 | 0.468 | 0.917 | 8.514 |
|  | PNI | -0.519 | -0.440 | -0.221 | 0.071 | 0.517 | 4.799 | 4.80 |
| Total |  | 4.899 | 2.544 | 1.753 | 1.575 | 10.771 | 100 | 100 |

Abbreviations: MMP, mycoplasma pneumoniae pneumonia; SMMP, severe mycoplasma pneumoniae pneumonia; LDC, leukocyte differential counts; PBP, peripheral blood protein; PBI, Peripheral blood inflammatory factors; PC, principal components; L, lymphocyte; M, monocyte; N, neutrophil; NLR, neutrophil-to-lymphocyte ratio; dNLR, derived neutrophil-to-lymphocyte ratio; HGB, hemoglobin; ALB, albumin; TP, total protein; CRP, C-reactive protein; SAA, Serum amyloid A; PCT, Procalcitonin; CAR, C-reactive protein-to-albumin ratio ;PNI, prognostic nutritional index.

Notes: The eigenvalue was calculated as the sum-of-squares of the loading of the variance that each PC explains; The percentage (%) was calculated by dividing the eigenvalue of each variance with the sum of all the eigenvalues (10.771); The sum (%) was defined as the sum of the percentages of each class of parameters.

1. Wishaupt JO, van der Ploeg T, de Groot R, Versteegh FG, Hartwig NG: **Single- and multiple viral respiratory infections in children: disease and management cannot be related to a specific pathogen**. *BMC Infect Dis* 2017, **17**(1):62.
